# Supplementary material
Source: PubMed Central journal article supplement (PMC1312375)

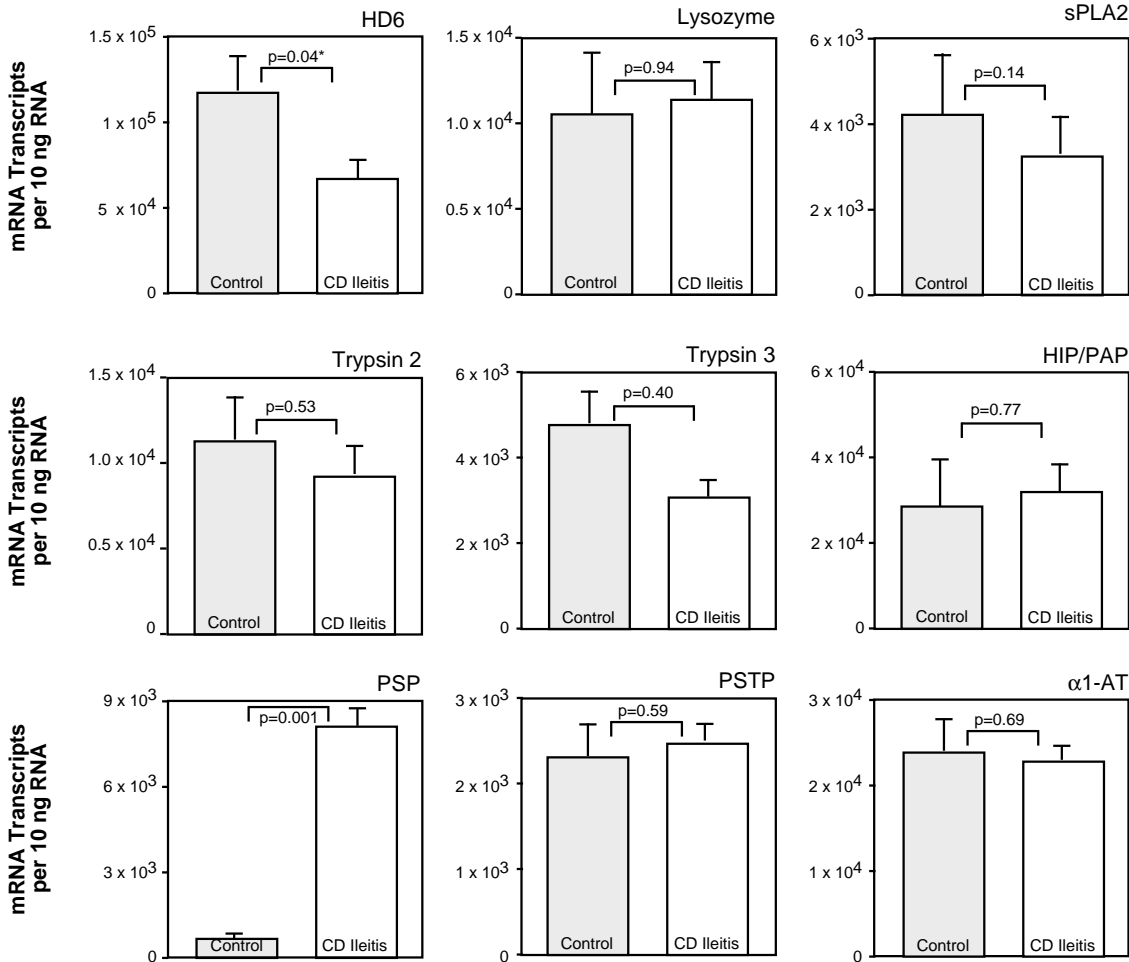

Supplement: pnas_0505256102_1.pdf [file pnas_0505256102_1.pdf]
